# Supplementary material
Source: PubMed Central journal article supplement (PMC3706840)
Supplement: supp_me.2012-1322_Binder1.pdf [file supp_me.2012-1322_Binder1.pdf]

**Supplemental Figure 1. UO 126 inhibitor does not inhibit PRL-activated Erk5** (A) TMX2-28 cells were serum deprived for 72h and treated with 100 ng/ml PRL for 0, 5, 15, 30, 45, 135 min and 48h. Cells were lysed, proteins were resolved by SDS-PAGE and analyzed by immunoblotting with the indicated antibodies. (B) TMX2-28 cells were serum deprived for 72h, treated with UO 126 (10  $\mu$ M, 1h) and PRL (100 ng/ml, 135 min). Cells were lysed, proteins were resolved by SDS-PAGE and analyzed by immunoblotting with the indicated antibodies.

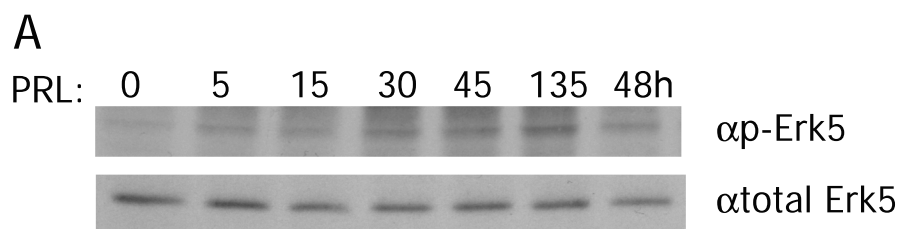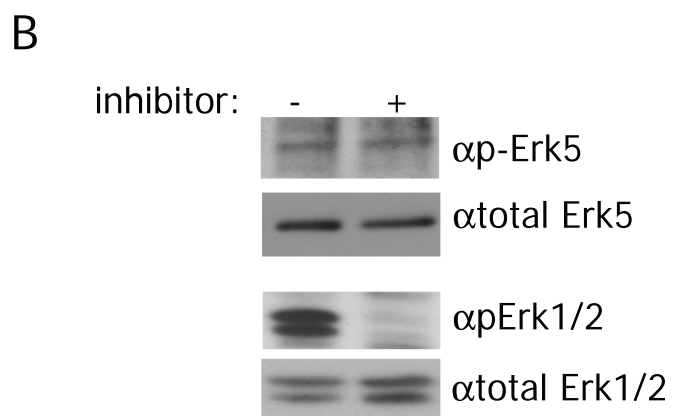

Supplemental Figure 1
